1 **Manuscript Title:** Pretreatment with LCK Inhibitors Chemosensitizes Cisplatin-Resistant  
2 Endometrioid Ovarian Tumors  
3

4 **Authors:**

5 Katie K. Crean-Tate, MD<sup>1</sup>; Chad Braley<sup>2</sup>; Goutam Dey, PhD<sup>2</sup>; Emily Esakov, PhD<sup>2</sup>; Caner  
6 Saygin, MD<sup>3</sup>; Alexandria Trestan<sup>2</sup>; Daniel J. Silver, PhD<sup>2</sup>; Soumya M. Turaga, PhD<sup>2</sup>; Elizabeth  
7 Connor, MD<sup>1</sup>; Robert DeBernardo, MD<sup>1</sup>; Chad M. Michener, MD<sup>1</sup>; Peter G. Rose, MD<sup>1</sup>; Justin  
8 Lathia, PhD<sup>2</sup>; Ofer Reizes, PhD<sup>2</sup>

9 **Affiliations:**

- 10 1. Department of Gynecologic Oncology, Cleveland Clinic Foundation, Women's Health  
11 Institute, Cleveland, OH  
12 2. Department of Cardiovascular and Metabolic Sciences, Lerner Research Institute, and  
13 Case Comprehensive Cancer Center, Cleveland, OH  
14 3. Department of Internal Medicine, The Ohio State University, Columbus, OH  
15  
16

17 **Please send correspondence to:**

18 Katie K. Crean-Tate, M.D.  
19 Department of Gynecologic Oncology  
20 Cleveland Clinic Foundation, Women's Health Institute  
21 9500 Euclid Avenue  
22 Cleveland OH 44195  
23 Phone: (216)973-2692  
24 Email: [kkcrean@gmail.com](mailto:kkcrean@gmail.com)  
25

26 Ofer Reizes, Ph.D.  
27 Department of Cardiovascular and Metabolic Sciences  
28 Cleveland Clinic Foundation, Lerner Research Institute  
29 9500 Euclid Avenue, NC10  
30 Cleveland OH 44195  
31 Phone: (216) 445-0880  
32 Email: [reizeso@ccf.org](mailto:reizeso@ccf.org)  
33  
34  
35  
36  
37  
38  
39  
40  
41  
42  
43  
44  
45  
46

47 **Abstract**

48 **Objective:** To evaluate LCK inhibitors (LCKi) as chemosensitizing agents for platinum-resistant  
49 endometrioid ovarian carcinoma.

50 **Methods:** KM Plotter survival data was obtained for endometrioid ovarian cancer based on LCK  
51 mRNA expression. Cisplatin resistant endometrioid ovarian carcinoma cell lines were cultured  
52 and treated first with LCKi or vehicle, then combination LCKi-cisplatin. Cell viability was  
53 assessed via CellTiter-Glo, and apoptosis with Caspase 3/7 Assay. Protein lysates were isolated  
54 from treated cells, with  $\gamma$ -H2Ax, a DNA adduct marker, assessed. *In vivo* study compared mice  
55 treated with vehicle or LCK inhibitor followed by LCK inhibitor, cisplatin, or combination  
56 therapy. One-way ANOVA and two sample t-test were used to assess statistical significance with  
57 GraphPad Prism.

58 **Results:** KM plotter data indicated LCK expression is associated with significantly worse  
59 median progression-free survival (HR 3.19, p=0.02), and a trend toward decreased overall  
60 survival in endometrioid ovarian tumors with elevated LCK expression (HR 2.45, p=0.41). *In*  
61 *vitro*, cisplatin resistant ovarian endometrioid cells treated first with LCKi followed by  
62 combination LCKi-cisplatin treatment showed decreased cell viability and increased apoptosis.  
63 Immunoblot studies revealed inhibition of LCK led to increased expression of  $\gamma$ -H2AX. *In vivo*  
64 results demonstrate treatment with LCKi followed by LCKi-cisplatin leads to significantly  
65 slowed tumor growth.

66 **Conclusions:** We identified a targetable pathway for chemosensitization of platinum resistant  
67 endometrioid ovarian cancer with initial treatment of LCKi followed by co-treatment with LCKi-  
68 cisplatin.

69 Abbreviations: LCK = Lymphocyte Cell-Specific Protein-Tyrosine Kinase

## 70 **1. Introduction**

71 Gynecologic malignancy is common, with endometrial and ovarian cancers the most common  
72 types in the United States. Ovarian cancer is the most fatal gynecologic malignancy in the United  
73 States, with only a 48% survival at 5 years after diagnosis[1]. Typically, advanced disease in  
74 ovarian cancer is treated with cytoreductive surgery and platinum-based chemotherapy. Up to  
75 15% of ovarian cancers have endometrioid subtype histologically[2]. Unfortunately, high-grade  
76 endometrioid cancers prove difficult to treat due to recurrence and chemoresistance[3]. In  
77 ovarian cancer, while up to 85% of patients will enter remission with standard treatment of  
78 debulking surgery and platinum-taxane chemotherapy, most of these patients will recur[4]. In the  
79 15% of patients failing standard therapy, disease persists or progresses within the first six months  
80 after chemotherapy, indicating platinum-resistant disease. For those who do enter remission,  
81 progression to platinum-resistant disease is pervasive[5]. The prognosis is particularly poor in  
82 those with platinum-resistant disease, with response rates below 20% for subsequent lines of  
83 chemotherapy and continued decrease in disease free interval with each subsequent therapy[6].  
84 As such, recurrent ovarian cancer is known as incurable, with goals of care aimed at symptom  
85 management with alternative regimens of chemotherapy[7]. Given the poor prognosis in those  
86 with platinum-resistant disease, identification of pathways of chemoresistance and subsequent  
87 chemosensitive therapies are on the forefront of cancer treatment[8].

88 Endometrioid tumors have previously been shown to exhibit a self-renewing population of cells  
89 termed cancer stem cells (CSC). CSCs are associated with both tumor recurrence and  
90 chemoresistance in multiple tumor types[9]–[12]. CD55, a membrane complement regulatory  
91 protein, has previously been indicated as a useful marker for high grade, resistant tumors in  
92 many tumor types [13]–[16]. CD55 is highly expressed in endometrioid CSCs [13]. Saygin et al.

93 determined that patient with endometrioid tumors highly expressing CD55, exhibit a poorer  
94 progression free survival compared to patients with tumors with low expression, and that CD55  
95 is highly expressed in platinum-resistant ovarian endometrioid cancer cells. Saygin et al. also  
96 showed that CD55 is necessary for maintenance of chemoresistance via activation of the non-  
97 receptor tyrosine kinase Lymphocyte Cell-Specific Protein-Tyrosine Kinase (LCK) to enhance  
98 cisplatin resistance by inducing DNA repair genes, a novel signaling pathway [13]. *In vitro*  
99 studies using saracatinib, an investigational drug that inhibits the LCK pathway, show  
100 sensitization of cisplatin resistant endometrioid cells to cisplatin in a CSC population. With  
101 inhibition of LCK, DNA repair genes were attenuated and cancer cells then showed increased  
102 sensitivity to cisplatin. Phase I studies of saracatinib utilized in multiple cancer types have  
103 indicated an appropriate safety profile, though follow up randomized human trials in ovarian  
104 cancer have fallen short in translating the effect into clinical use[17], [18]. With our initial results  
105 and proposed mechanism of action of chemosensitization, we hypothesized that treating cancer  
106 cells first with an LCK inhibitor followed by co-treatment with an LCK inhibitor and cisplatin  
107 would enhance the chemosensitization effect. Our primary objective was to test this hypothesis  
108 *in vitro*, followed by *in vivo* proof of concept test in cisplatin resistance endometrioid cancer  
109 model.

110

## 111 **2. Methods**

### 112 *2.1 Cell Culture*

113 Ovarian endometrioid adenocarcinoma cell lines A2780 (cisplatin sensitive) and its cisplatin  
114 resistant daughter cell line CP70 were cultured in DMEM medium supplemented with 10% heat-  
115 inactivated fetal bovine serum at 37°C in a humidified atmosphere in 5% CO<sub>2</sub>. Cisplatin resistant

116 endometrioid cancer cell line HEC1a was cultured in modified McCoy's 5a medium  
117 supplemented with 10% heat-inactivated fetal bovine serum, also at similar conditions. Cell lines  
118 were obtained from Cleveland Clinic centralized research core facility, through which cell lines  
119 were previously obtained from the American Type Culture Collection (ATCC) and  
120 authenticated. At approximately 80% confluence, trypsin (0.25%)/EDTA solution or Accutase  
121 was used to lift cells for passaging as needed for continued experiments until passage 10, at  
122 which point a fresh allotment of cells was plated. Cisplatin was obtained from Cleveland Clinic  
123 Hospital pharmacy, with 1mg/mL stock solutions stored at room temperature protected from  
124 light given its photosensitivity. Saracatinib (AZD0530) was purchased from Selleck Chemicals  
125 and 10  $\mu$ M stock solutions were aliquoted and stored at -20°C. PP2 (AG1879) was purchased  
126 from Selleck Chemicals and 10  $\mu$ M stock solutions aliquoted and stored at -20°C.

127

## 128 *2.2 Proliferation Assays and Caspase 3/7 Assays*

129 The appropriate cancer cells for each experiment were pre-treated with Saracatinib (1 $\mu$ M), PP2  
130 (10-50  $\mu$ M), or vehicle (DMSO at similar concentration to drug of interest) for 4 days in T75  
131 flasks. Cells were then plated in 96-well plates at 5,000 cells/well on seeding Day 0, manually  
132 counted by hemocytometer using Trypan blue dye exclusion as live cell marker. Cisplatin was  
133 then applied the next day at doses of 0-10  $\mu$ M, with/without Saracatinib, PP2 or vehicle, and  
134 treatment was ongoing for 4 to 6 days. Measured proliferation was assessed by CellTiter-Glo  
135 (Promega, Southampton, UK) as per manufacturer's instructions. Percentage survival was  
136 normalized to the untreated control for each group.

137 Caspase 3/7 Assay kit (Promega, Southampton, UK) was utilized to assess apoptosis as per  
138 manufacturer's instructions. This was performed alongside CellTiter-Glo to correct for viable

139 cell density. Relative caspase activities were normalized to untreated controls in each group, with  
140 activity assessed from 30 - 120minutes.

141

### 142 *2.3 Immunoblotting*

143 Protein lysates were obtained with cell lysis in 20mM Tris-HCl (pH 7.5), 150mM NaCl, 1 mM  
144 Na<sub>2</sub>EDTA, 1% NP-40, 1 mM EGTA, 1% sodium pyrophosphate, 1 mM  $\beta$ -glycerophosphate,  
145 1mM sodium orthovanadate, 1  $\mu$ g/mL leupeptin, 20 mM NaF and 1 mM PMSF. Protein  
146 concentrations were measured with BCA Protein Assay Kit (ThermoFisher Scientific). Protein  
147 concentrations from 20-50  $\mu$ g of total protein were resolved in 10-12% SDS-PAGE and  
148 transferred to PVDF membrane. Membranes were incubated overnight at 4°C with primary  
149 antibodies against pLCK (Y394) (1:1000) (R&D Systems), GAPDH (1:1000) (Cell Signaling),  
150 and  $\gamma$ -H2AX (1:1000) (Cell Signaling). Secondary anti-mouse or anti-rabbit IgG antibodies  
151 conjugated to horse radish peroxidase (HRP) (1:3000) (Cell Signaling) or (1:25,000) (ProMega)  
152 were used. ECl was then used (Pierce) to visualize immunoreactive bands.

153

### 154 *2.4 In vivo Study*

155 All animal procedures were evaluated and approved prior to initiation by the Institutional Animal  
156 Care and Use Committee (IACUC) of the Cleveland Clinic Lerner Research Institute. NOD  
157 severe combined immunodeficient (SCID) IL2R gamma (NSG) mice were purchased from the  
158 Biological Response Unit (BRU) at the Cleveland Clinic and housed in microisolator units under  
159 IACUC protocol #2018-1940. Thirty mice were injected intraperitoneally with 1 million CP70-  
160 luciferase virally transduced cells. At the time of injection (day 0), mice were placed in one of  
161 two arms, which started day 3: six mice began receiving pre-treatment with Saracatinib

162 (Selleck), 25mg/kg dissolved in 0.5% hydroxypropyl methylcellulose (Sigma-Aldrich), 0.1%  
163 Tween 80 (Sigma-Aldrich) via oral gavage three days per week, and 24 mice received vehicle  
164 via oral gavage on the same schedule.

165 Bioluminescence images to detect tumor burden were taken with Xenogen *in vivo* imaging  
166 system (IVIS, PerkinElmer) using D-luciferin as previously described[19]. Mice received an IP  
167 injection of D-luciferin (Goldbio LUCK-1G, 150mg/kg in 150 $\mu$ L) under inhaled isoflurane  
168 anesthesia. Images were analyzed (Living Image Software) and bioluminescence plots of photon  
169 flux (photons/second/cm<sup>2</sup>/steradian) over time were computed for each mouse, with  
170 normalization against day 0 signal values. Non-tumor and black backgrounds were also  
171 subtracted from each tumor burden region of interest. All images were obtained with a 15 second  
172 exposure. On day 16 when all mice were confirmed to have tumor by IVIS, mice pretreated with  
173 saracatinib were also treated with cisplatin (2.5mg/kg, 3 times per week) injected  
174 intraperitoneally. On day 16, mice pretreated with vehicle were randomly assigned to one of four  
175 arms (6 mice per arm), whereby they were treated with cisplatin, saracatinib, combination  
176 cisplatin and saracatinib, or vehicle alone. Mice were sacrificed on day 30 and all visible tumor  
177 was collected for future studies. All mouse procedures were performed under adherence to  
178 protocols approved by the Institute Animal Care and Use Committee at the Lerner Research  
179 Institute, Cleveland Clinic.

180

### 181 *2.5 Statistical Analysis*

182 Statistical analysis was calculated by one-way ANOVA and two sample t-test, with p-values  
183 included. Statistical significance is denoted via \* to represent p-value of <0.05 but >0.01, \*\*  
184 representing p-value of <0.01 but >0.001, and \*\*\* representing p-value <0.001. For proliferation

185 assays, IC50 was calculated using nonparametric values set to nonlinear fit curve as per  
186 statistical analysis performed with GraphPad Prism. Survival data was obtained from Kaplan-  
187 Meier Plotter (KM Plotter: <http://kmplot.com/analysis/>) for endometrioid ovarian cancer based  
188 on CD55 and LCK mRNA expression. KM Plotter survival data is obtained from an online  
189 database collected from The Cancer Genome Atlas (TCGA), Gene Expression Omnibus (GEO)  
190 and European Genome-phenome Archive (EGA).

191

### 192 **3. Results**

#### 193 *3.1 CD55 and LCK expression are associated with poorer patient survival*

194 Given the previously described mechanism of CD55 regulation of cisplatin resistance via the  
195 LCK pathway, we hypothesized that both increased CD55 and LCK expression would be  
196 associated with worse clinical outcomes. We assessed survival outcomes with increased CD55  
197 and LCK expression for endometrioid ovarian cancer using Kaplan-Meier Plotter database (KM  
198 Plotter: <http://kmplot.com/analysis/>). CD55 expression is associated with a significantly worse  
199 median progression-free survival (HR 2.98,  $p < 0.05$ , **Fig. 1a**) but did not inform median overall  
200 survival (HR 6.48,  $p = 0.055$ , **Fig. 1b**). We then assessed survival outcome in LCK expressed  
201 ovarian tumors. In endometrioid ovarian cancer, LCK expression is associated with significantly  
202 worse median progression-free survival (HR 3.19,  $p = 0.02$ , **Fig. 1c**). Overall survival is not  
203 significantly different between groups, though a non-significant trend toward decreased survival  
204 was seen with HR 2.45 ( $p = 0.41$ , **Fig. 1d**). These data indicate increased CD55 and LCK  
205 expression in endometrioid ovarian cancer correlates with poorer clinical outcomes.

206



207 *3.2 Pretreatment with LCK inhibitors chemosensitize cisplatin resistant endometrioid cells and*  
208 *increase apoptosis*

209 In our prior studies, LCK inhibition in the ovarian endometrioid CSC population led to increased  
210 cisplatin sensitivity[13]. Given that CSCs are known to be a chemoresistant population closely  
211 associated with disease recurrence, we theorized that inhibition of the LCK pathway would lead  
212 to sensitization of platinum resistant endometrioid cells. To test our hypothesis, we performed *in*  
213 *vitro* cellular proliferation assays in cisplatin resistant ovarian endometrioid cells (CP70) treated  
214 with vehicle or the LCK inhibitor (LCKi) saracatinib followed by cisplatin sensitivity with  
215 varying concentrations of cisplatin. It is noted that these tests would not include only a CSC  
216 population as with Saygin's study[13], but rather included all CP70 cells. As there was no  
217 significant difference with co-treatment of LCKi and cisplatin alone, we hypothesized that  
218 pretreatment with LCKi is required to effectively sensitize these cells to cisplatin. We found that  
219 CP70 cells demonstrated significantly decreased proliferation when pretreated with saracatinib  
220 and then treated with combination saracatinib-cisplatin (**Fig. 2a**). We also tested these cells in a  
221 Caspase Glo assay to assess for apoptosis. We determined that CP70 cells pretreated with  
222 saracatinib followed by cisplatin plus saracatinib increased apoptosis compared to no  
223 pretreatment (**Fig. 2b**). These findings were replicated in HEC1a, a cisplatin resistant  
224 endometrioid cancer model. HEC1a pretreated with saracatinib followed by cisplatin cotreatment  
225 with saracatinib exhibited inhibition of cell viability (**Fig. 2c**) and increased apoptosis (**Fig. 2d**)  
226 compared to vehicle treated cells.

227 To validate our hypothesis that initial LCK inhibitor treatment followed by co-treatment of  
228 LCKi-cisplatin leads to decreased proliferation specifically in cisplatin resistant endometrioid  
229 cells, we performed a proliferation assay in A2780 cells, the chemo-naive parent cell line of

230 CP70. We found that pretreatment with saracatinib, as well as simultaneous treatment with  
231 saracatinib and cisplatin, did not significantly alter the cell viability (**Fig. 2e**). To validate our  
232 hypothesis that saracatinib chemosensitizes these cells via LCK inhibition, we pretreated CP70  
233 cells with an alternative LCK inhibitor, PP2, followed by cisplatin co-treatment, and found a  
234 dose responsive decrease in cell proliferation seen as compared to control groups treated with  
235 cisplatin only (**Fig. 2f**). These data indicate that platinum resistant endometrioid cells pretreated  
236 with LCKi followed by co-treatment with LCKi and cisplatin show decreased cell proliferation  
237 and increased apoptosis.

238

239 *3.3 Cisplatin resistant endometrioid cells treated with LCK inhibitors reveal DNA double strand*  
240 *breaks.*

241 To investigate the mechanism by which LCK inhibitors decrease cisplatin resistance, we tested  
242 whether LCK inhibitors decrease phosphorylation of LCK in CP70 cells by immunoblot. We  
243 found that phosphorylated LCK (pLCK) was significantly reduced when cells are exposed to  
244 LCK inhibitors saracatinib and PP2. GAPDH was used as a loading control (**Fig. 3a**). We tested  
245 for DNA double strand breaks by blotting for  $\gamma$ H2AX, a histone that is phosphorylated after  
246 DNA double strand breaks occur [20], [21]. We found an increase in  $\gamma$ H2AX in LCK-inhibitor  
247 treated cells (**Fig.3b**). These data indicate that endometrioid ovarian cancer cells exposed to  
248 LCKi demonstrate a decrease in phosphorylated LCK and an increase in DNA double strand  
249 breaks.

250

251 *3.4 Treatment with LCK inhibitor followed by co-treatment of LCKi-cisplatin decreases tumor*  
252 *growth in vivo.*

253 Given the *in vitro* findings, we next tested our hypothesis in an *in vivo* model. We injected NSG  
254 mice with CP70 cells virally transduced with luciferase and utilized *in vivo* imaging system  
255 (IVIS) to assess weekly tumor growth. After injection of tumor cells (day 0), mice were placed in  
256 one of two arms: pre-treatment with saracatinib or vehicle via oral gavage three days per week,  
257 initiated day 3. On day 16 when all mice were confirmed to have detectable tumor on IVIS, mice  
258 pretreated with saracatinib were injected with cisplatin three times weekly, and mice pretreated  
259 with vehicle were randomly assigned to one of four arms: cisplatin, saracatinib, combination  
260 cisplatin and saracatinib, or vehicle alone, given three times per week. Mice were then sacrificed  
261 on day 30 (**Fig. 4a**). Mice treated first with vehicle followed by cisplatin, saracatinib, or  
262 combination cisplatin and saracatinib all showed a steady increase in tumor burden over time.  
263 However, in mice first treated with saracatinib followed by combination cisplatin and saracatinib  
264 therapy, tumor growth appeared stable or attenuated (**Fig. 4b, c**). At the experimental endpoint  
265 (Day 30), the vehicle group indicated that tumor growth was statistically similar to cisplatin,  
266 saracatinib, and combination cisplatin and saracatinib arms. However, there was a significant  
267 reduction in tumor growth seen in the pretreatment saracatinib followed by combination  
268 saracatinib-cisplatin arm as compared to vehicle as well as combination only (**Fig. 4d**). These  
269 data demonstrate that pretreatment with LCKi followed by LCKi-cisplatin co-treatment leads to  
270 decreased tumor burden in cisplatin resistant endometrioid ovarian cancer *in vitro*.

271

### 272 *3.5 LCK inhibition as a targetable pathway for platinum resistant ovarian endometrioid cells.*

273 It has been established that downstream of CD55, LCK stimulates expression of DNA repair  
274 genes, leading to cisplatin resistance[13]. We hypothesized that inhibition of LCK would lead to  
275 sensitization of cisplatin resistant cells. We found that pretreating cisplatin resistant ovarian

276 endometrioid cells with an LCK inhibitor prior to co-treatment of LCKi and platinum therapy  
277 leads to sensitization of a chemoresistant tumor. This identifies a targetable pathway and  
278 indicates LCK inhibitors may play a role in adjunctive therapy for platinum resistant ovarian  
279 endometrioid cancer (**Fig. 5**).

280

#### 281 **4. Discussion**

282 Despite most ovarian cancers displaying an excellent initial response to standard  
283 chemotherapy, the majority of advanced stage patients recur, with eventual resistance to our  
284 most effective chemotherapy agents. This pattern of pervasive relapse and ensuing  
285 chemoresistance is the cause for the poor survival rates seen in ovarian cancer today [3], [5], [9].  
286 Studies have focused on cell populations known for chemoresistance, cancer stem cells (CSCs),  
287 in order to identify a targetable pathway to reduce recurrence[9]–[11]. Previous studies by  
288 Saygin et al.[13] identified a novel pathway leading to chemoresistance in endometrioid tumors  
289 in which CD55 mediated DNA repair via phosphorylation of LCK. We assessed clinical  
290 outcomes associated with LCK expression. We found that endometrioid ovarian cancers highly  
291 expressing CD55 indicated worse clinical outcomes, with significant effects in progression free  
292 survival (PFS) (HR 2.98,  $p=0.04$ ). Given our prior finding that the CD55/LCK pathway is  
293 involved in chemoresistance, we assessed survival in tumors highly expressing LCK. We found  
294 that high LCK expression predicted an even more significant effect on PFS with a three-fold  
295 increase in survival from 13 months to 34 months in low vs high LCK expressing tumors. This  
296 data suggest a clinical benefit to addressing tumors with increased LCK expression, and thus a  
297 potential targetable pathway in recurrent ovarian endometrioid tumors.

298 Standard chemotherapy in ovarian cancer includes a platinum and taxane agent, and  
299 survival decreases as response to platinum therapy diminishes. Prior studies have found that  
300 cisplatin resistance is seen with multiple pathways, including increased DNA repair enzyme  
301 expression and associated reduction in DNA adducts [9], [13], [22]. Through LCK inhibition,  
302 DNA repair enzyme expression is attenuated. Given this anticipated initial chemosensitization  
303 step, we pursued pretreatment with LCK inhibitors followed by cotreatment with cisplatin, and  
304 found that this technique was effective in decreasing cancer cell populations and increasing  
305 apoptosis in vitro (**Fig. 2**). We verified the effects of inhibition of LCK on DNA damage, and  
306 found an increase in DNA adduct formation with LCK inhibition in immunoblot studies (**Fig. 3**),  
307 an indication that targeting this pathway allows platinum therapy to function in a previously  
308 cisplatin resistant cell population.

309 A common challenge in translational research is that while *in vitro* studies may prove  
310 promising, translating this to effective *in vivo* studies and clinical trials can prove difficult.  
311 Saracatinib, an investigational LCK inhibitor, has been studied for many cancer types, with  
312 mixed results. Studies on safety found appropriate dosing for saracatinib in humans for effective  
313 pharmacodynamics while limiting toxicity, indicating this drug would be tolerable in clinical  
314 trials [17]. While utilizing saracatinib as monotherapy has not proven efficacious, combination  
315 therapy has yielded more promising results. In a study combining saracatinib with carboplatin  
316 and/or paclitaxel in solid tumors, objective responses were seen in ovarian, breast and skin  
317 cancers, with longest response durations seen in patients with ovarian cancer [17]. However, a  
318 randomized trial further assessed treatment with saracatinib in combination with weekly  
319 paclitaxel in platinum-resistant ovarian cancer, and found that co-treatment of saracatinib with  
320 weekly paclitaxel did not improve outcomes [18]. Of note, the majority of these tumors were

321 serous histology, and patients received only weekly Taxol without platinum in addition to  
322 saracatinib. There is no clinical randomized data assessing saracatinib with cisplatin use in  
323 platinum resistant patients. We see from this clinical data that saracatinib is well-tolerated and  
324 may have a role in combination therapy in platinum resistant disease. We tested this hypothesis  
325 with a novel administration of saracatinib followed by co-treatment with cisplatin and found  
326 decreased rate of tumor growth *in vivo* (**Fig. 4**), identifying a targetable pathway (**Fig. 5**) and  
327 providing a novel therapeutic regimen for platinum resistant ovarian endometrioid carcinoma.

328         This study's strength lies in the proof of concept findings using both *in vitro* and *in vivo*  
329 models. Additionally, whereas prior studies focused on a specific cell population, cancer stem  
330 cells, this study utilized a more heterogenous cell population, more closely simulating a typical  
331 tumor microenvironment. Further investigation should be performed in additional histologic  
332 types such as serous and clear cell, as well as substitution of cisplatin for co-treatment with  
333 carboplatin, a commonly used platinum agent. Patients with platinum resistant disease have often  
334 received multiple lines of chemotherapy previously and further treatments offer limited  
335 therapeutic benefit. Given our promising findings, further studies are indicated to pursue LCK  
336 inhibitors as an adjunctive therapy to platinum resistant disease in clinical trials.

337

### 338 **Conclusion**

339 In summary, we identified a targetable pathway for chemosensitization of platinum resistant  
340 ovarian endometrioid cancer. We found that pretreatment with LCK inhibitors followed by co-  
341 treatment with cisplatin leads to decreased cell viability and increased apoptosis *in vitro*. This is  
342 associated with increased DNA adduct formation and significantly reduced tumor growth *in vivo*.  
343 Further studies are needed to assess the mechanisms behind the enhanced efficacy of

344 pretreatment, as well as further investigation of LCK inhibitors as adjunctive therapy for  
345 platinum resistant endometrioid ovarian carcinoma, including other histological subtypes.

346  
347  
348  
349  
350  
351

352 **Conflict of Interest Statement:**

353 OR has a patent for CD55 as a therapeutic target in cisplatin resistant endometrial cancer  
354 pending.

355 CM receives personal fees from Clovis Oncology.

356 The other authors have no relevant financial or conflicts of interest to disclose for this work.

357

358 **Acknowledgements:** Research in the Reizes laboratory is supported by VeloSano Bike to Cure  
359 Impact Award, the Laura J. Fogarty Endowed Chair for Uterine Cancer Research and the  
360 Cleveland Clinic Foundation Lerner Institute.

361

362 **Author Contribution:**

363 KKCT: Hypothesis generation, study design, experiment execution, data analysis, and primary  
364 manuscript authorship.

365 CB, GD: Contributed to experiment execution and data collection.

366 EE: Contributed to data organization, analysis, and manuscript editing.

367 CS, EC: Contributed to hypothesis generation, experiment execution and data organization.

368 AT: Contributed to experiment execution and data collection.

369 DS: Contributed to data organization and manuscript editing.

370 ST: Contributed to experiment execution.

371 RB, CM, PGR: Contributed to data and manuscript review.

372 JL: Contributed to hypothesis generation and study design.

373 OR: Significant contributions to hypothesis generation, study design, and manuscript editing.

374

## 375 **References**

376

377 [1] "Cancer of the Ovary - Cancer Stat Facts," *SEER*.

378 <https://seer.cancer.gov/statfacts/html/ovary.html> (accessed May 08, 2020).

379 [2] Disaia PJ, Creasman WT, Mannel RS, McMeekin DS, Mutch DG, *Clinical Gynecologic*  
380 *Oncology*, 9th ed. Philadelphia: Elsevier, 2012.

381 [3] R. F. Ozols, "Treatment goals in ovarian cancer," *International Journal of Gynecologic*  
382 *Cancer*, vol. 15, no. Suppl 1, pp. 3–11, 2005.

383 [4] G. Corrado, V. Salutari, E. Palluzzi, M. G. Distefano, G. Scambia, and G. Ferrandina,  
384 "Optimizing treatment in recurrent epithelial ovarian cancer," *Expert review of anticancer*  
385 *therapy*, vol. 17, no. 12, pp. 1147–1158, 2017.

386 [5] E. Pujade-Lauraine and P. Combe, "Recurrent ovarian cancer," *Annals of Oncology*, vol. 27,  
387 no. suppl\_1, pp. i63–i65, 2016.

388 [6] L. C. Hanker, S. Loibl, N. Burchardi, J. Pfisterer, W. Meier, E. Pujade-Lauraine, *et al.*, "The  
389 impact of second to sixth line therapy on survival of relapsed ovarian cancer after primary  
390 taxane/platinum-based therapy," *Annals of oncology*, vol. 23, no. 10, pp. 2605–2612, 2012.

391 [7] M. Fung-Kee-Fung, T. Oliver, L. Elit, A. Oza, H. W. Hirte, and P. Bryson, "Optimal  
392 chemotherapy treatment for women with recurrent ovarian cancer," *Curr Oncol*, vol. 14,  
393 no. 5, pp. 195–208, Oct. 2007.

394 [8] B. J Monk, T. J Herzog, and K. S Tewari, "Evolution of chemosensitivity and resistance assays  
395 as predictors of clinical outcomes in epithelial ovarian cancer patients," *Current*  
396 *pharmaceutical design*, vol. 22, no. 30, pp. 4717–4728, 2016.

397 [9] A. Wiechert, C. Saygin, P. S. Thiagarajan, V. S. Rao, J. S. Hale, N. Gupta, *et al.*, "Cisplatin  
398 induces stemness in ovarian cancer," *Oncotarget*, vol. 7, no. 21, pp. 30511–30522, Apr.  
399 2016, doi: 10.18632/oncotarget.8852.

400 [10] S. Kyo, Y. Maida, and M. Inoue, "Stem cells in endometrium and endometrial cancer:  
401 accumulating evidence and unresolved questions," *Cancer letters*, vol. 308, no. 2, pp. 123–  
402 133, 2011.

403 [11] T. Reya, S. J. Morrison, M. F. Clarke, and I. L. Weissman, "Stem cells, cancer, and cancer  
404 stem cells," *nature*, vol. 414, no. 6859, pp. 105–111, 2001.

405 [12] D. Xiang, S. Shigdar, A. G. Bean, M. Bruce, W. Yang, M. Mathesh, *et al.*, "Transforming  
406 doxorubicin into a cancer stem cell killer via EpCAM aptamer-mediated delivery,"  
407 *Theranostics*, vol. 7, no. 17, pp. 4071–4086, Sep. 2017, doi: 10.7150/thno.20168.



- 408 [13] C. Saygin, A. Wiechert, V. S. Rao, R. Alluri, E. Connor, P. S. Thiagarajan, *et al.*, “CD55  
409 regulates self-renewal and cisplatin resistance in endometrioid tumors,” *Journal of*  
410 *Experimental Medicine*, vol. 214, no. 9, pp. 2715–2732, 2017.
- 411 [14] Z.-W. Meng, M.-C. Liu, H.-J. Hong, Q. Du, and Y.-L. Chen, “Expression and prognostic  
412 value of soluble CD97 and its ligand CD55 in intrahepatic cholangiocarcinoma,” *Tumor*  
413 *Biology*, vol. 39, no. 3, p. 1010428317694319, 2017.
- 414 [15] Y. He, W. Wang, L. Xu, L. Li, J. Liu, M. Feng, *et al.*, “Immunohistochemical expression and  
415 prognostic significance of CD97 and its ligand DAF in human cervical squamous cell  
416 carcinoma,” *International Journal of Gynecological Pathology*, vol. 34, no. 5, pp. 473–479,  
417 2015.
- 418 [16] M. Liu, Y.-J. Yang, H. Zheng, X.-R. Zhong, Y. Wang, Z. Wang, *et al.*, “Membrane-bound  
419 complement regulatory proteins are prognostic factors of operable breast cancer treated  
420 with adjuvant trastuzumab: a retrospective study,” *Oncol. Rep.*, vol. 32, no. 6, pp. 2619–  
421 2627, Dec. 2014, doi: 10.3892/or.2014.3496.
- 422 [17] S. Kaye, S. Aamdal, R. Jones, G. Freyer, E. Pujade-Lauraine, E. G. E. de Vries, *et al.*, “Phase  
423 I study of saracatinib (AZD0530) in combination with paclitaxel and/or carboplatin in  
424 patients with solid tumours,” *Br. J. Cancer*, vol. 106, no. 11, pp. 1728–1734, May 2012, doi:  
425 10.1038/bjc.2012.158.
- 426 [18] I. A. McNeish, J. A. Ledermann, L. Webber, L. James, S. B. Kaye, M. Hall, *et al.*, “A  
427 randomised, placebo-controlled trial of weekly paclitaxel and saracatinib (AZD0530) in  
428 platinum-resistant ovarian, fallopian tube or primary peritoneal cancer†,” *Ann. Oncol.*, vol.  
429 25, no. 10, pp. 1988–1995, Oct. 2014, doi: 10.1093/annonc/mdu363.
- 430 [19] M. Toyoshima, Y. Tanaka, M. Matumoto, M. Yamazaki, S. Nagase, K. Sagamura, *et al.*,  
431 “Generation of a Syngeneic Mouse Model to Study the Intraperitoneal Dissemination of  
432 Ovarian Cancer With in Vivo Luciferase Imaging,” *Luminescence: the journal of biological*  
433 *and chemical luminescence*, Oct. 2009.  
434 [https://pubmed.ncbi.nlm.nih.gov/19711487/?from\\_single\\_result=PMID%3A+19711487&expanded\\_search\\_query=PMID%3A+19711487](https://pubmed.ncbi.nlm.nih.gov/19711487/?from_single_result=PMID%3A+19711487&expanded_search_query=PMID%3A+19711487) (accessed May 28, 2020).
- 436 [20] K. Lj and Y. Lx, “Gamma-H2AX - A Novel Biomarker for DNA Double-Strand Breaks,” *In*  
437 *vivo (Athens, Greece)*, Jun. 2008.  
438 [https://pubmed.ncbi.nlm.nih.gov/18610740/?from\\_term=gamma-h2ax&from\\_pos=2](https://pubmed.ncbi.nlm.nih.gov/18610740/?from_term=gamma-h2ax&from_pos=2)  
439 (accessed May 22, 2020).
- 440 [21] A. Kinner, W. Wu, C. Staudt, and G. Iliakis, “ $\gamma$ -H2AX in recognition and signaling of DNA  
441 double-strand breaks in the context of chromatin,” *Nucleic acids research*, vol. 36, no. 17,  
442 pp. 5678–5694, 2008.
- 443 [22] G. Damia and M. Broggin, “Platinum Resistance in Ovarian Cancer: Role of DNA Repair,”  
444 *Cancers (Basel)*, vol. 11, no. 1, Jan. 2019, doi: 10.3390/cancers11010119.
- 445 [23] A. Gucalp, J. A. Sparano, J. Caravelli, J. Santamauro, S. Patil, A. Abbruzzi, *et al.*, “Phase II  
446 trial of saracatinib (AZD0530), an oral SRC-inhibitor for the treatment of patients with  
447 hormone receptor-negative metastatic breast cancer,” *Clin. Breast Cancer*, vol. 11, no. 5,  
448 pp. 306–311, Oct. 2011, doi: 10.1016/j.clbc.2011.03.021.
- 449 [24] P. N. Lara, J. Longmate, C. P. Evans, D. I. Quinn, P. Twardowski, G. Chatta, *et al.*, “A  
450 phase II trial of the Src-kinase inhibitor AZD0530 in patients with advanced castration-

- 451 resistant prostate cancer: a California Cancer Consortium study," *Anticancer Drugs*, vol. 20,  
452 no. 3, pp. 179–184, Mar. 2009, doi: 10.1097/CAD.0b013e328325a867.
- 453 [25] S. M. Reddy, S. Kopetz, J. Morris, N. Parikh, W. Qiao, M. J. Overman, *et al.*, "Phase II  
454 study of saracatinib (AZD0530) in patients with previously treated metastatic colorectal  
455 cancer," *Invest New Drugs*, vol. 33, no. 4, pp. 977–984, Aug. 2015, doi: 10.1007/s10637-  
456 015-0257-z.
- 457 [26] H. J. Mackay, H. J. Au, E. McWhirter, T. Alcindor, A. Jarvi, K. MacAlpine, *et al.*, "A phase II  
458 trial of the Src kinase inhibitor saracatinib (AZD0530) in patients with metastatic or locally  
459 advanced gastric or gastro esophageal junction (GEJ) adenocarcinoma: a trial of the PMH  
460 phase II consortium," *Invest New Drugs*, vol. 30, no. 3, pp. 1158–1163, Jun. 2012, doi:  
461 10.1007/s10637-011-9650-4.
- 462 [27] M. G. Fury, S. Baxi, R. Shen, K. W. Kelly, B. L. Lipson, D. Carlson, *et al.*, "Phase II study of  
463 saracatinib (AZD0530) for patients with recurrent or metastatic head and neck squamous  
464 cell carcinoma (HNSCC)," *Anticancer Res.*, vol. 31, no. 1, pp. 249–253, Jan. 2011.
- 465 [28] S. A. Laurie, G. D. Goss, F. A. Shepherd, M. N. Reaume, G. Nicholas, L. Philip, *et al.*, "A  
466 phase II trial of saracatinib, an inhibitor of src kinases, in previously-treated advanced non-  
467 small-cell lung cancer: the princess margaret hospital phase II consortium," *Clin Lung  
468 Cancer*, vol. 15, no. 1, pp. 52–57, Jan. 2014, doi: 10.1016/j.clc.2013.08.001.

469  
470  
471  
472  
473  
474  
475  
476  
477  
478  
479  
480  
481  
482  
483  
484  
485  
486  
487  
488  
489  
490  
491  
492  
493  
494  
495

496  
497  
498  
499  
500  
501  
502  
503  
504  
505  
506  
507  
508

## Figure Legends

509 **Figure 1. CD55 and LCK expression are associated with poorer patient survival.**

510 Kaplan-Meier progression-free and overall survival curves were obtained from Kaplan-Meier  
511 Plotter (KM Plotter: <http://kmplot.com/analysis/>) for endometrioid ovarian cancer patients who  
512 had high versus low tumor mRNA expression of CD55 (**A, B**) and LCK (**C, D**) prior to therapy.

513 **Figure 2. LCK inhibitors chemosensitize cisplatin resistant endometrioid cells and increase**  
514 **apoptosis.**

515 Cisplatin resistant ovarian endometrioid cells (CP70) were cultured and pretreated with an LCK  
516 inhibitor (saracatinib) or vehicle, followed by vehicle or combination LCKi-cisplatin, followed  
517 by cell viability assay performed with the CellTiterGlo Assay (**A**). Caspase 3/7 Assay was then  
518 performed to assess apoptosis (**B**). A second cisplatin resistant endometrioid cell line (HEC1a)  
519 was similarly treated and tested with subsequent proliferation and apoptosis assays performed  
520 (**C, D**). Cisplatin sensitive ovarian endometrioid cells (A2780) were cultured and treated  
521 according to the aforementioned paradigm (**E**). An alternative LCK inhibitor (PP2) was utilized  
522 for pretreatment in CP70 cells followed by co-treatment with PP2-cisplatin (**F**). All data  
523 represent at minimum three independent experiments.

524 **Figure 3. Cisplatin resistant endometrioid cells treated with LCK inhibitors indicate**  
525 **decreased pLCK and ovarian endometrioid cells treated with LCK inhibitor indicate**  
526 **increased DNA double strand breaks.**

527 Protein lysates from cisplatin resistant ovarian endometrioid cancer cells (CP70) treated with  
528 vehicle (DMSO), LCK inhibitor saracatinib (Sar), or PP2 were immunoblotted for pLCK, with  
529 GAPDH used as a loading control. Values normalized to vehicle control. (A) Protein lysates  
530 from ovarian endometrioid cancer cells (TOV112D) treated with varied doses of saracatinib  
531 (Sar) were immunoblotted for  $\gamma$ H2AX, with GAPDH used as a loading control (B).

532 **Figure 4. Pretreatment with LCK inhibitor followed by LCKi-cisplatin treatment**  
533 **attenuates tumor burden.**

534 NSG mice were injected with CP70-luciferase transfected cells followed by pretreatment with  
535 LCKi (6 mice) or vehicle (24 mice) for 14 days. LCKi mice were then co-treated with LCKi and  
536 cisplatin, and vehicle mice were randomized to further treatment with vehicle, cisplatin,  
537 saracatinib, or combination (6 mice per arm) (A). IVIS imaging was obtained on a weekly basis  
538 to assess tumor growth (B). IVIS luminescence was corrected to baseline for each arm and  
539 assessed over time (C) and at the experimental endpoint (D).

540 **Figure 5. LCK pathway regulates cisplatin resistance in endometrioid tumors.**

541 Downstream of CD55, LCK stimulates expression of DNA repair genes, leading to cisplatin  
542 resistance. This targetable pathway identifies LCK inhibitors as adjunctive therapy for platinum  
543 resistant ovarian endometrioid cancer.

544

# Platinum resistant endometrioid ovarian cancer cell

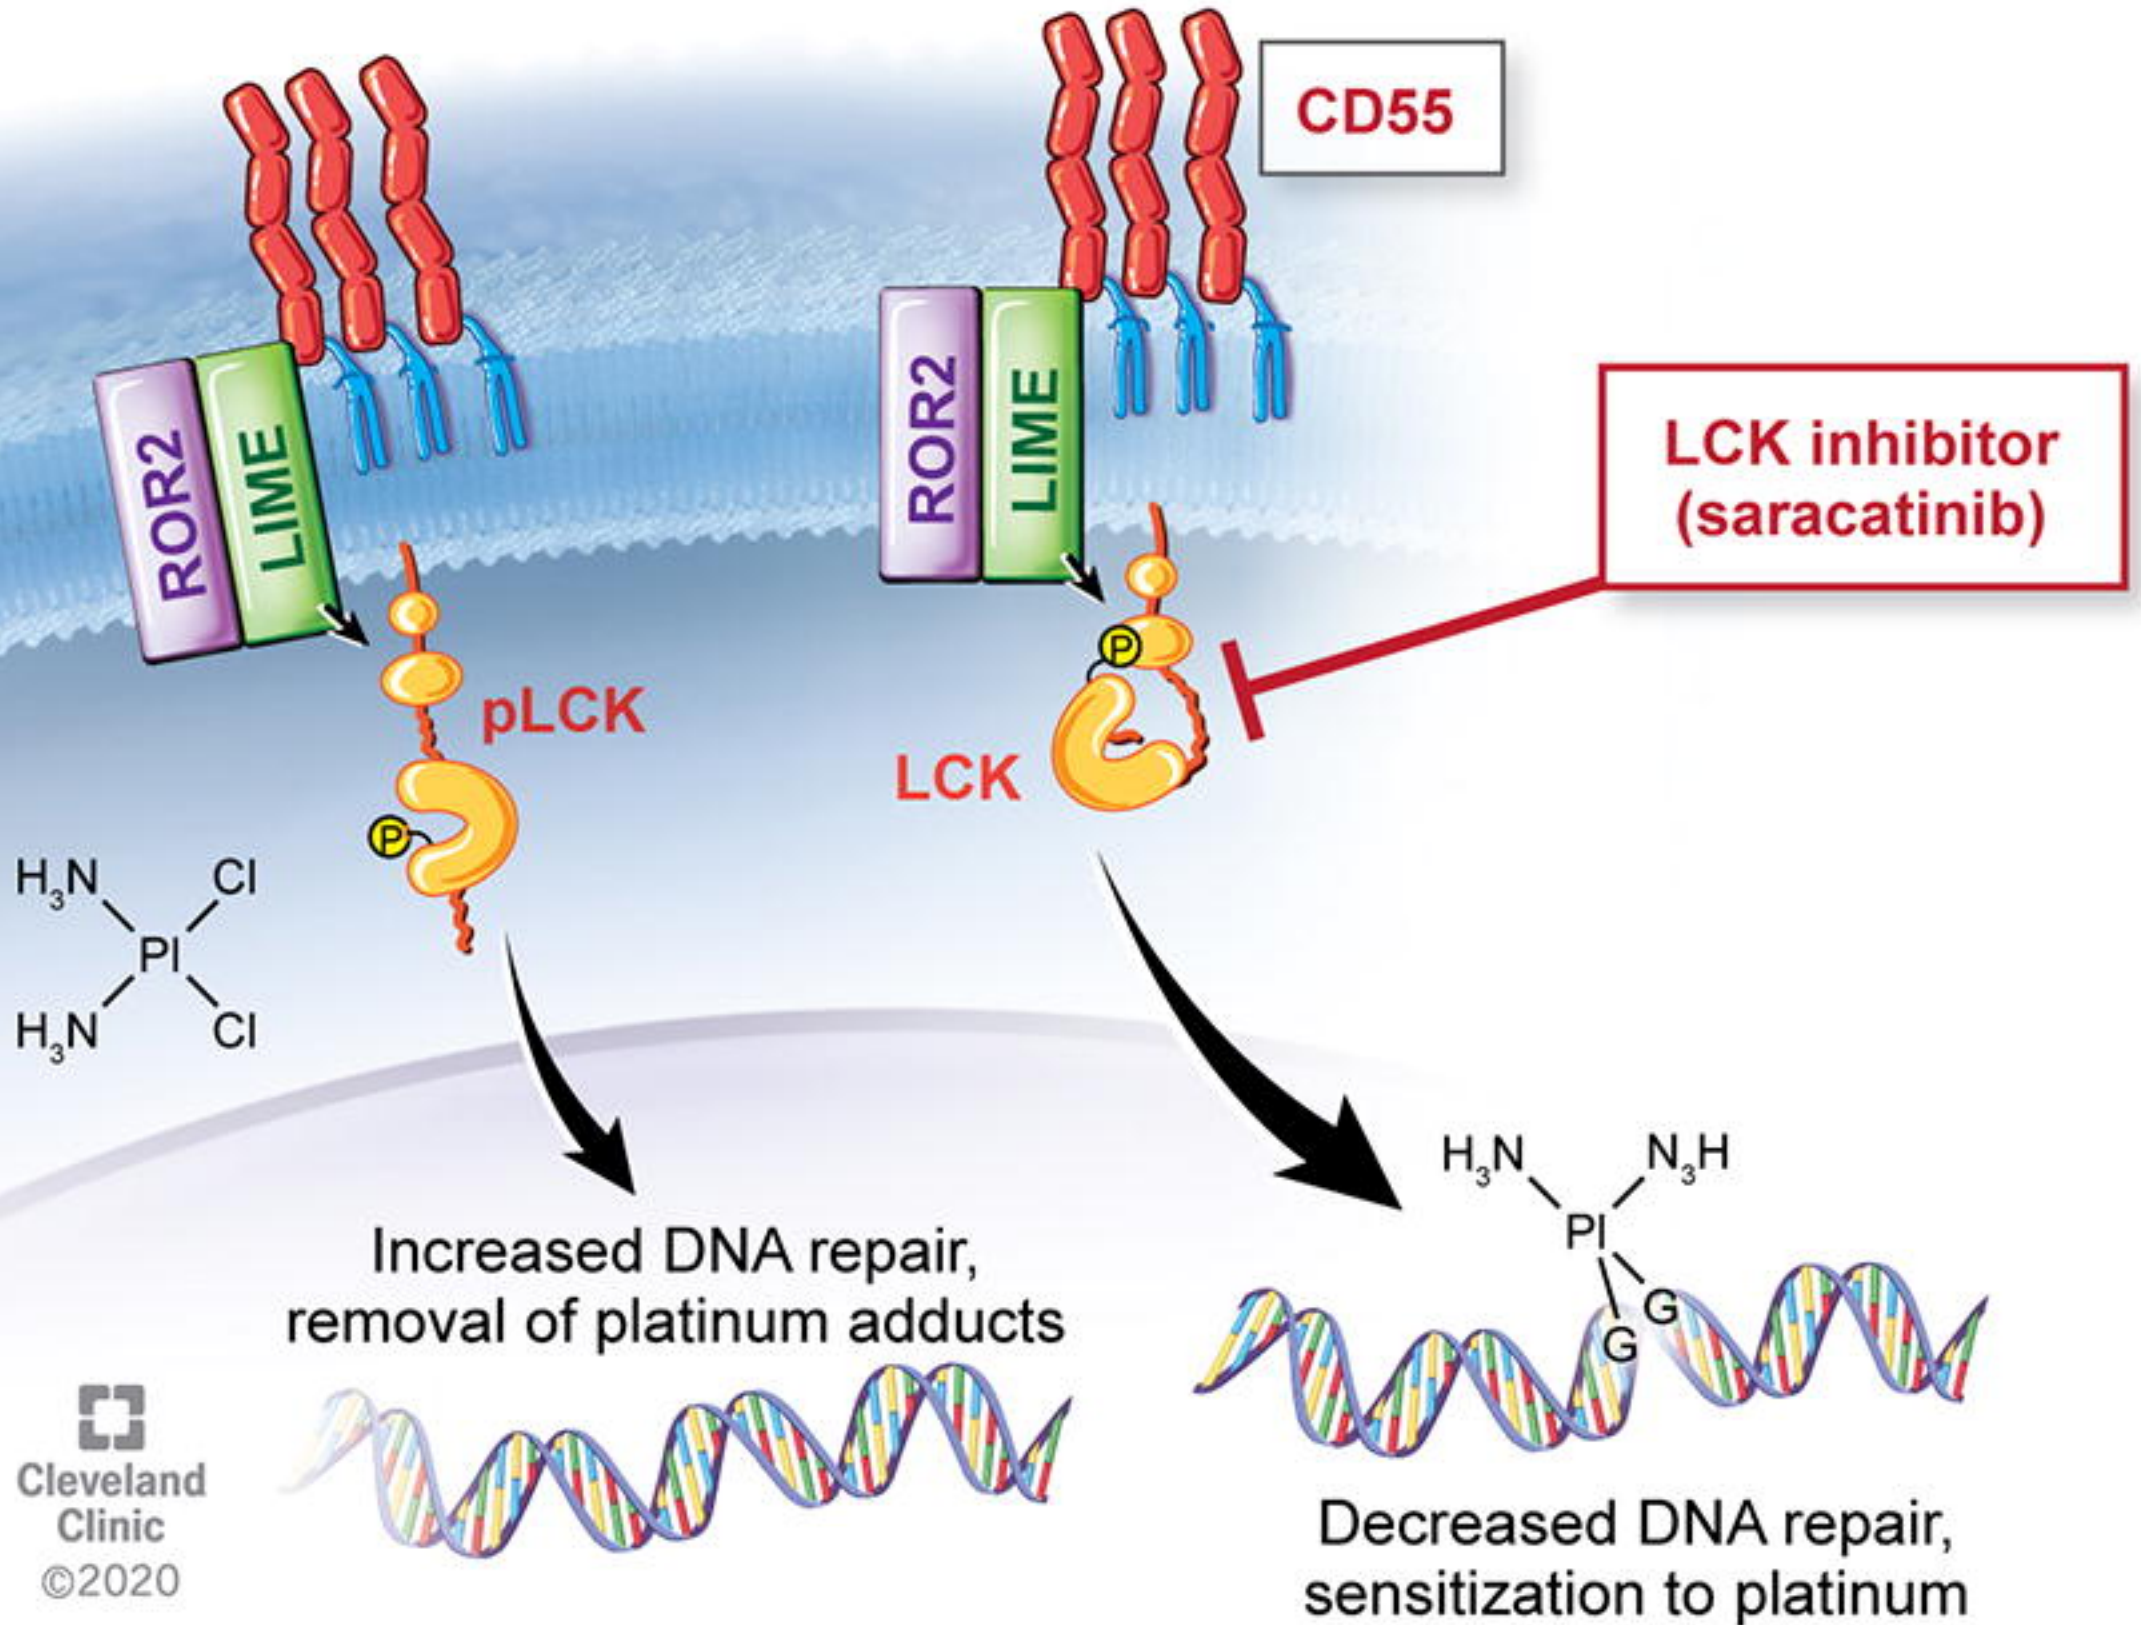

A.

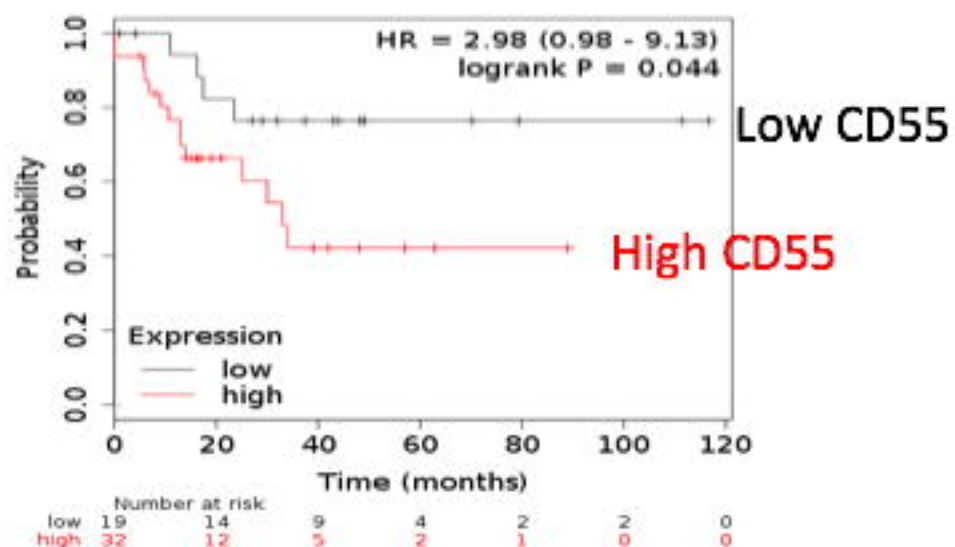

PFS

B.

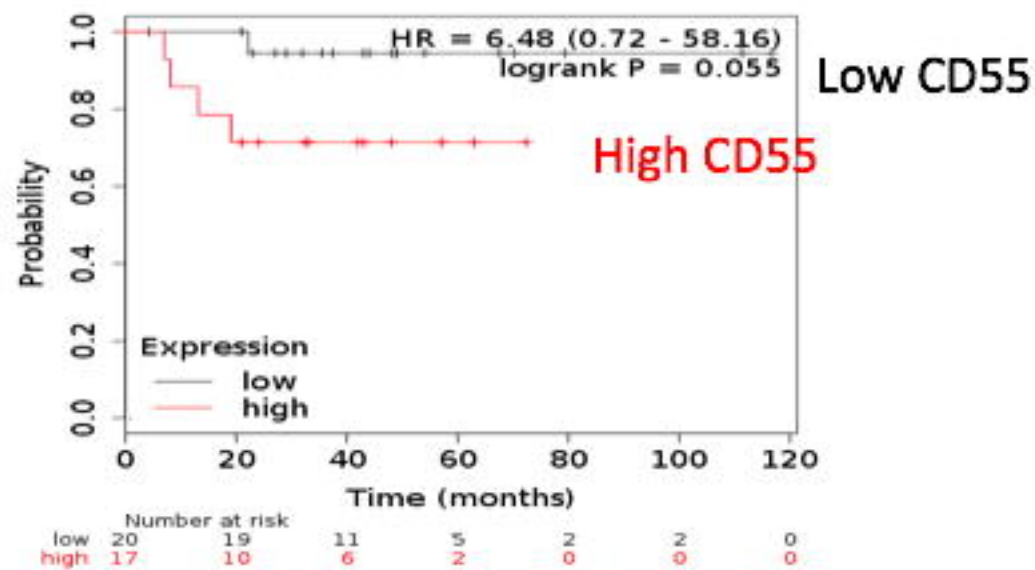

OS

C.

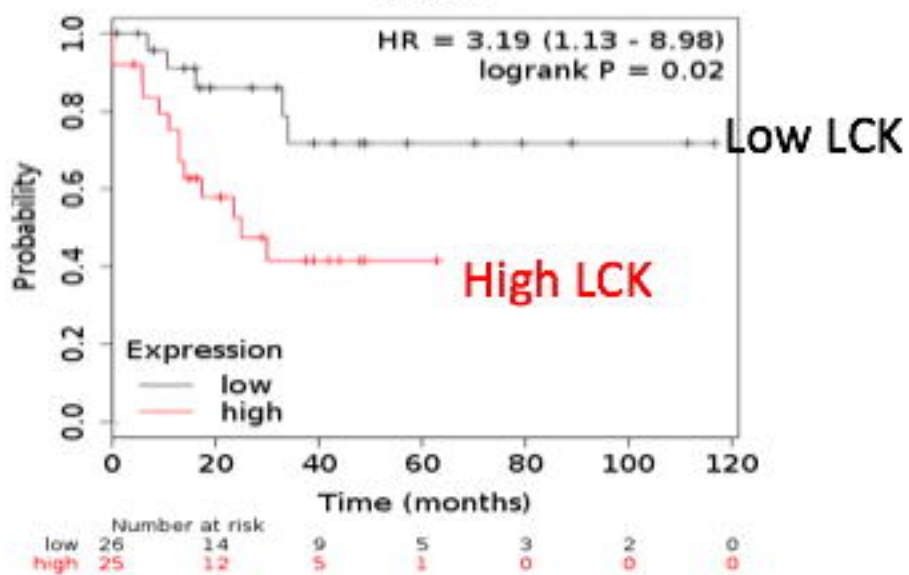

PFS

D.

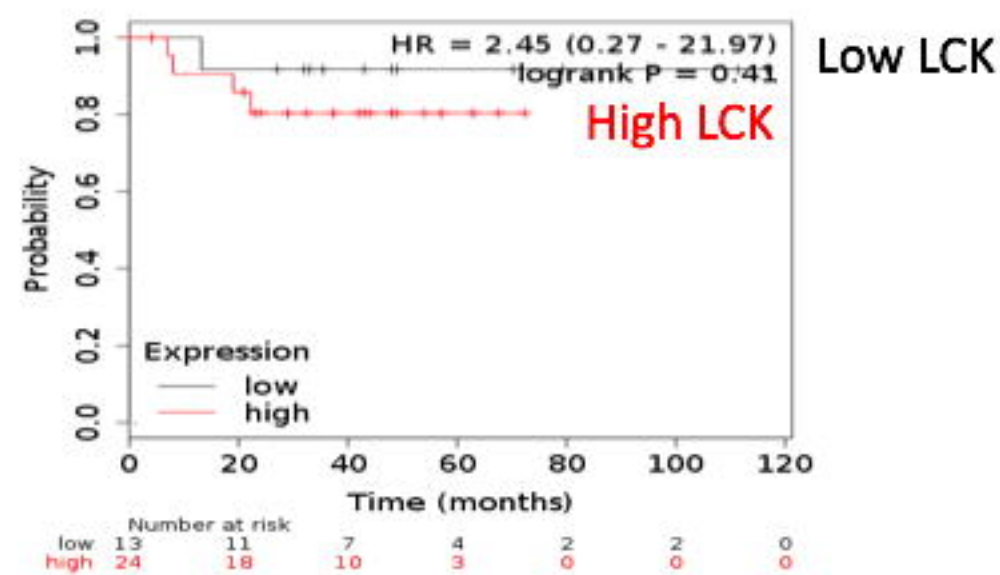

OS

**FIG 2.**

**A.**

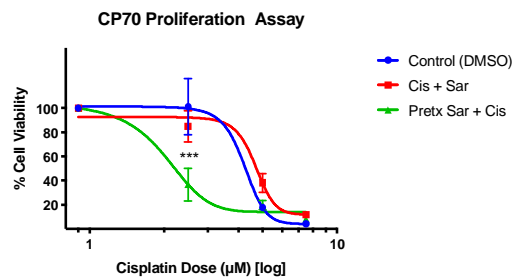

**B.**

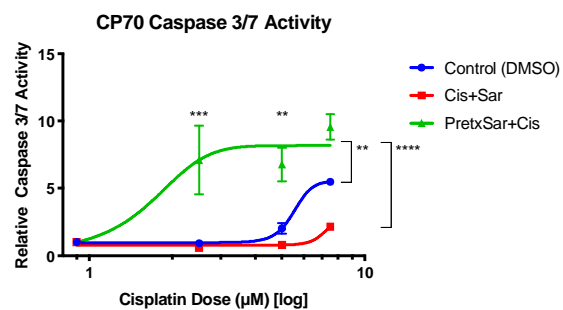

**C.**

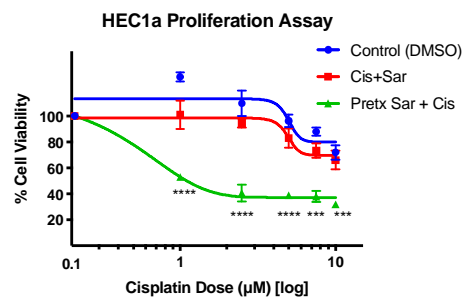

**D.**

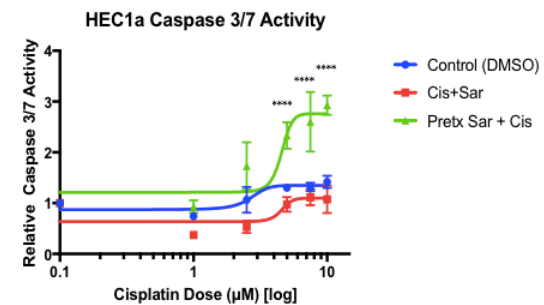

**E.**

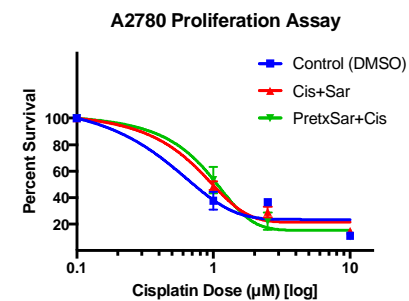

**F.**

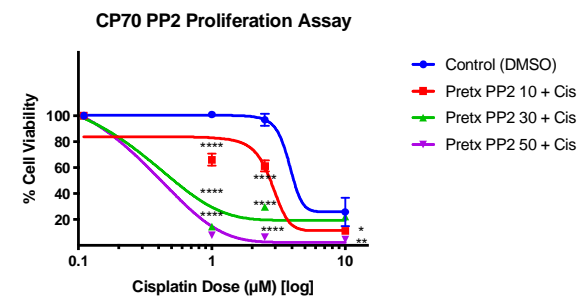

**FIG 3.**

**A.**

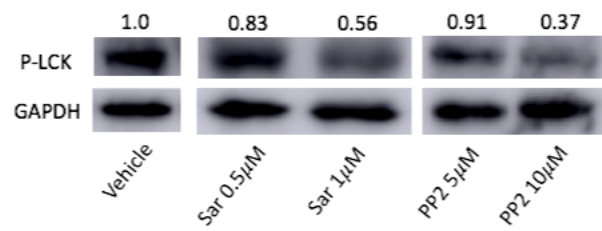

**B.**

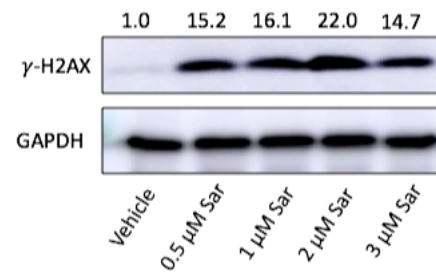



**FIG 4.**

**A.**

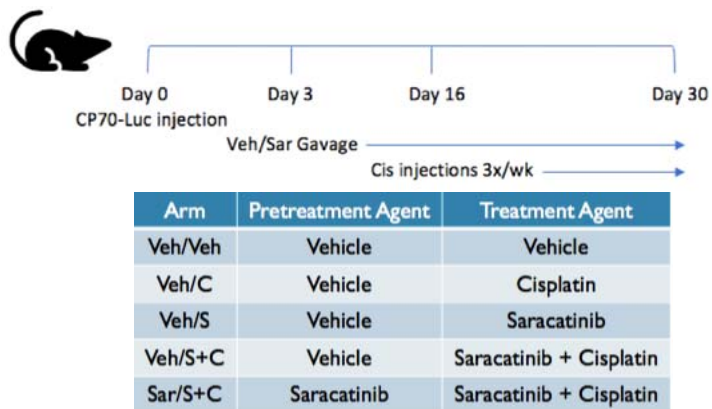

**B.**

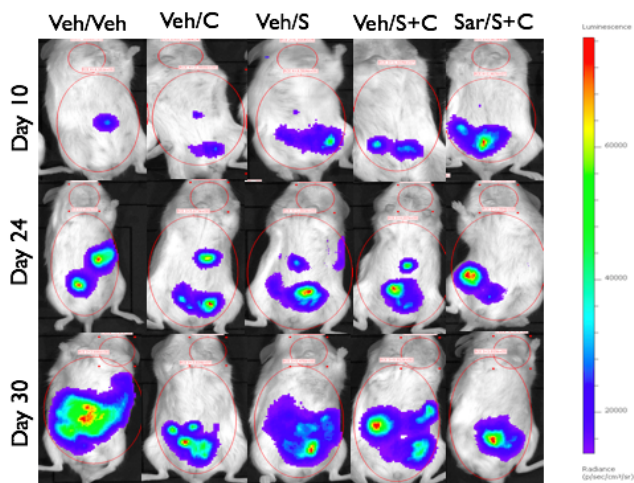

**C.**

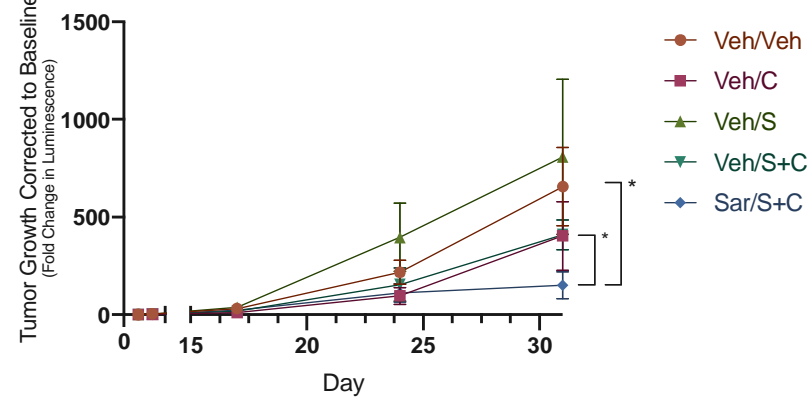

**D.**

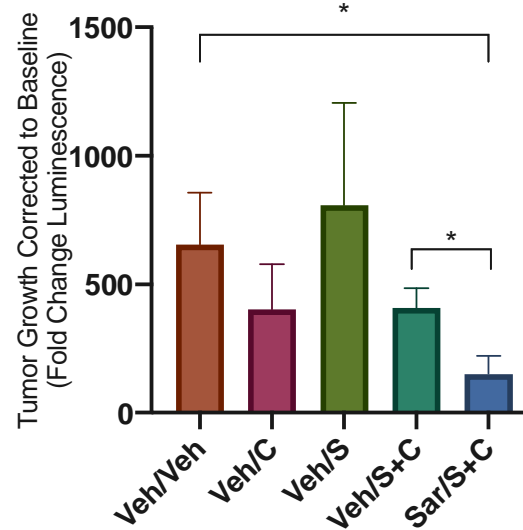

Source: https://www.biorxiv.org/content/10.1101/2020.06.18.154732v1.full.pdf
